# Supplementary material for: Fertility Preservation in Childhood Cancer: Endocrine Activity in Prepubertal Human Testis Xenografts Exposed to a Pubertal Hormone Environment
Source: PubMed Central journal article supplement (PMC7600569; doi:10.3390/cancers12102830), 2020-09-30
Supplement: cancers-12-02830-s001.pdf [file cancers-12-02830-s001.pdf]

Supplementary Figures

## Fertility Preservation in Childhood Cancer: Endocrine Activity in Prepubertal Human Testis Xenografts Exposed to a Pubertal Hormone Environment

Marsida Hutka, Prashant Kadam, Dorien Van Saen, Natalie Z. Homer, Jaime Onofre, W. Hamish B. Wallace, Lee B. Smith, Jan-Bernd Stukenborg, Ellen Goossens and Rod T. Mitchell

### Pre-graft control

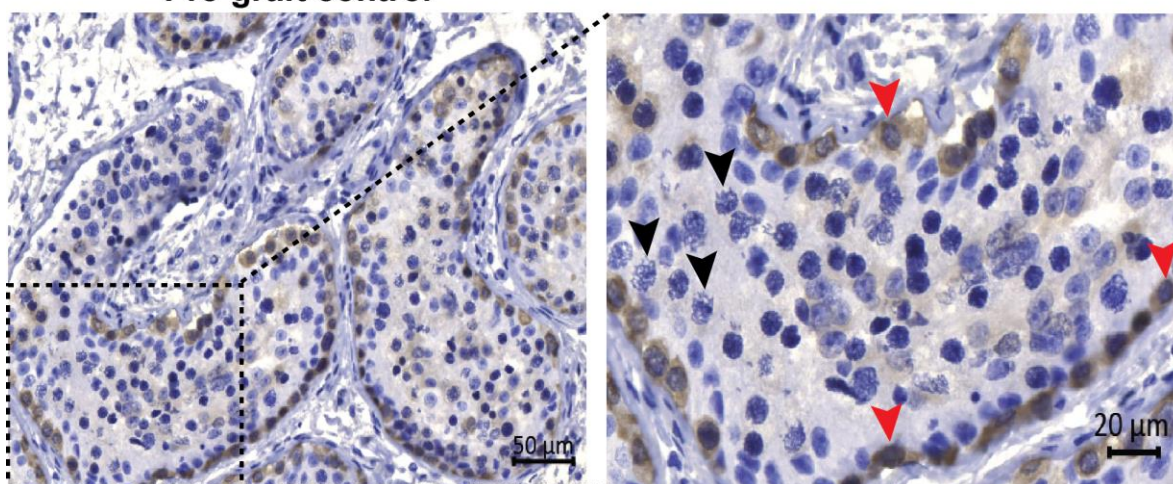

**Figure S1.** Expression of MAGE-A4 in peripubertal human testis tissue (13-year-old). Higher magnification image on the right shows the presence of spermatogonia (MAGE-A4<sup>+</sup>) and spermatocytes within the seminiferous tubule. Red arrowheads point to spermatogonia. Black arrowheads point to spermatocytes. Scale bars: 20 µm and 50 µm.

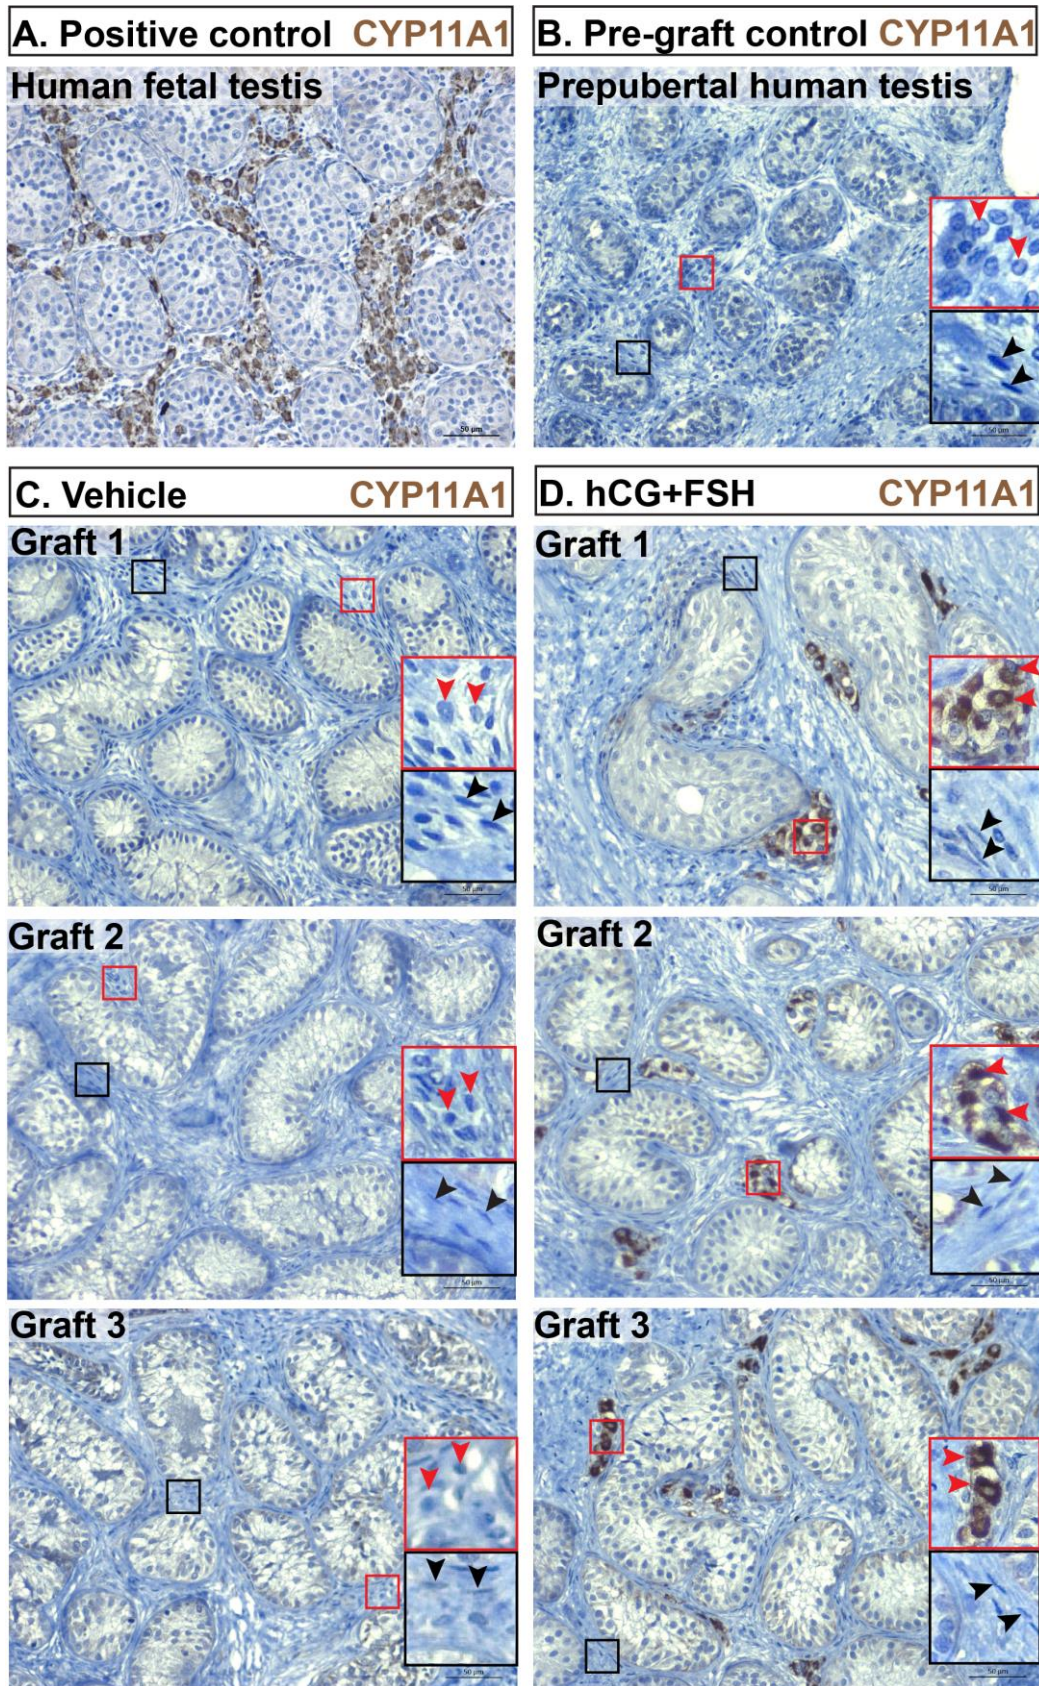

**Figure S2.** Expression of CYP11A1 in prepubertal human testis grafts. (A) Positive control (second-trimester human fetal testis). (B) Pre-graft control (5-year-old). (C) Subcutaneous grafts exposed to vehicle for 12 weeks. (D) Subcutaneous grafts exposed to gonadotrophins for 12 weeks. Red arrowheads point to round-shaped interstitial cells. Black arrowheads point to spindle-shaped interstitial cells. Scale bars: 50  $\mu$ m.
